# Supplementary material for: G-CSF and G-CSFR Induce a Pro-Tumorigenic Macrophage Phenotype to Promote Colon and Pancreas Tumor Growth
Source: MDPI journal article supplement (doi:10.3390/cancers12102868), 2020-10-06
Supplement: s1 [file s1]

Supplementary Materials

# G-CSF and G-CSFR Induce a Pro-Tumorigenic Macrophage Phenotype to Promote Colon and Pancreas Tumor Growth

Ioannis Karagiannidis, Eliane de Santana Van Vilet, Erika Said Abu Egal, Brandon Phinney, Damian Jacenik Eric R. Prossnitz and Ellen J. Beswick

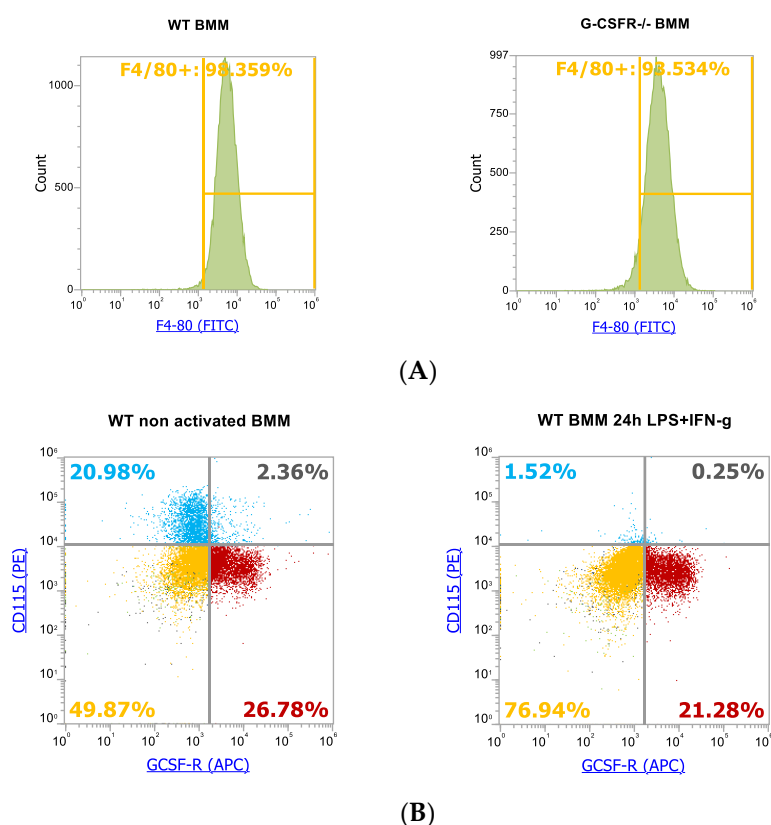

**Figure S1.** BMM cells express (A) F4/80 and (B) G-CSFR in the CD115 negative population as shown by flow cytometry of in vitro differentiated BMM.

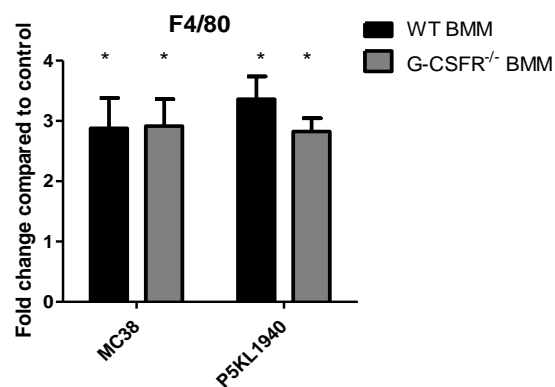

**Figure S2.** MC38 and P5KL1940 tumors have increased F4/80 gene expression compared to control tumors indicating approximately 3-fold increase in the macrophage marker for both WT and G-CSFR<sup>-/-</sup> adoptive transfer experiments.  $n = 6$ , \*  $p < 0.05$ .

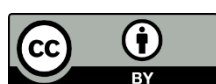

© 2020 by the authors. Licensee MDPI, Basel, Switzerland. This article is an open access article distributed under the terms and conditions of the Creative Commons Attribution (CC BY) license (<http://creativecommons.org/licenses/by/4.0/>).
